# Supplementary material for: Maternal iron deficiency perturbs embryonic cardiovascular development in mice
Source: PubMed Central journal article supplement (PMC8187484; doi:10.1038/s41467-021-23660-5), 2021-06-08
Supplement: 41467_2021_23660_MOESM1_ESM.pdf [file 41467_2021_23660_MOESM1_ESM.pdf]

**Supplementary Figure 1. Mice and embryos continuously fed a low iron diet from weaning are ID and anaemic**

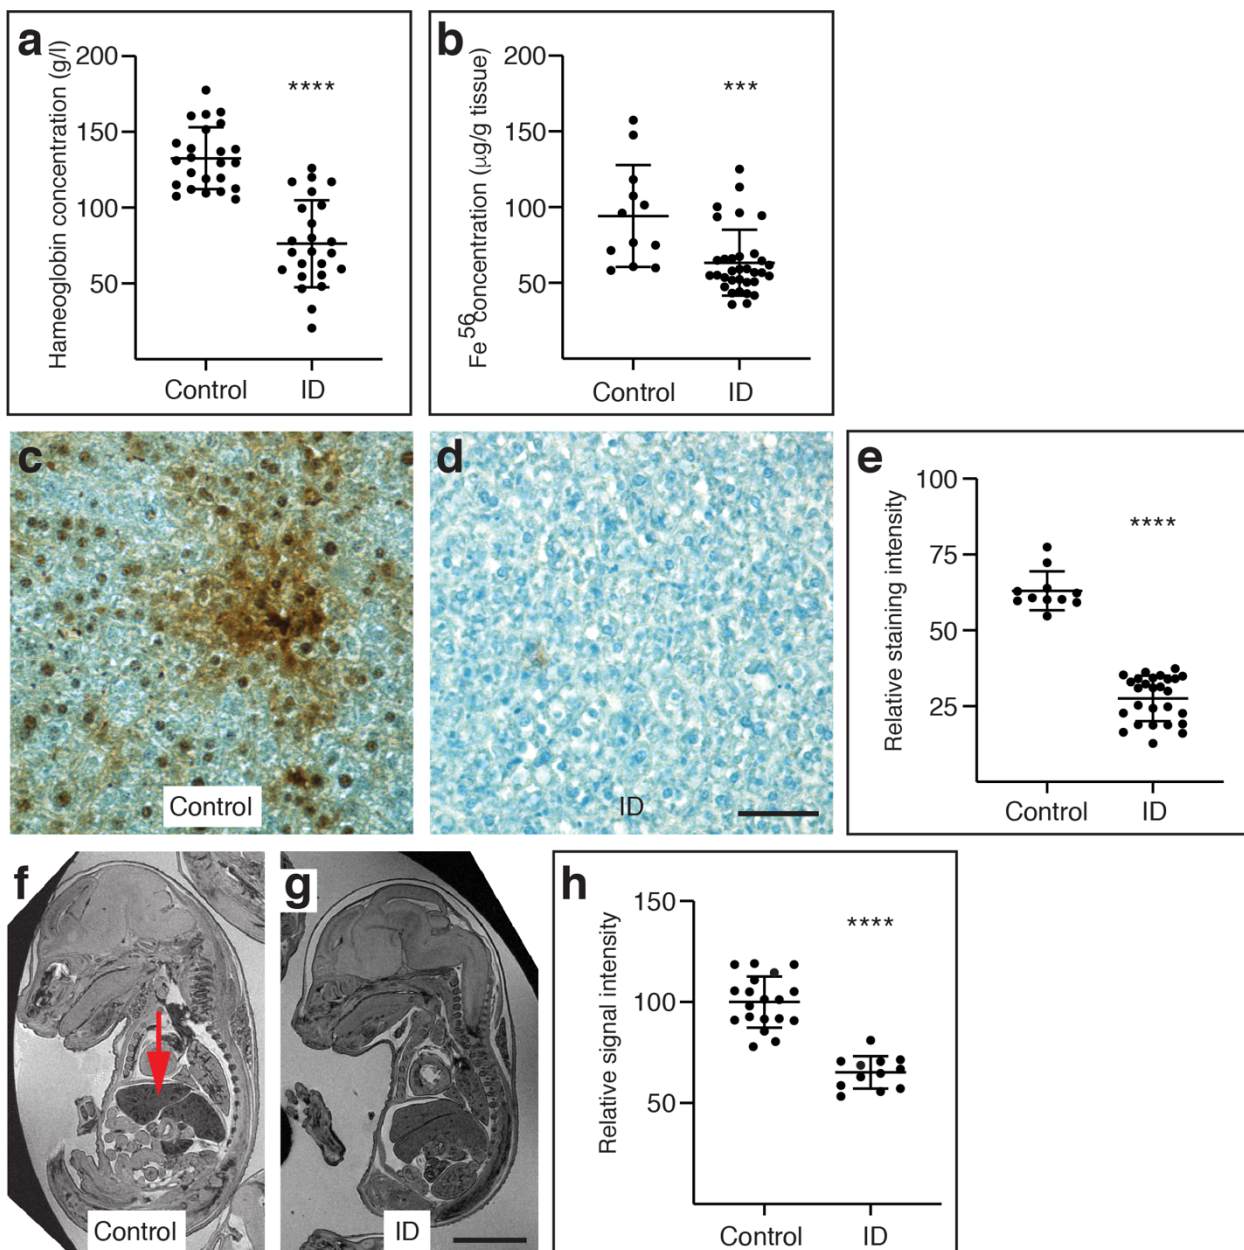

(a) Comparison of blood haemoglobin concentrations between adult female mice fed since weaning on control (200 ppm iron, n=24) or low iron (2-6 ppm iron, n=24) diet. (b) Comparison of Fe<sup>56</sup> concentration in liver samples measured by Inductively Coupled Plasma Mass Spectrometry from control (n=12) and ID (n=33) mice. (c-e) Representative images showing relative DAB-enhanced Perl's staining of liver sections from control (c) or ID (d) mice. (e) Quantitation of Perl's staining from livers from control (n=11) and ID (n=27) mice. (f-h) Representative images showing relative liver MRI contrast from control (f) or ID (g) E15.5 embryos. The embryonic liver is shown by a red arrow. (g) Quantitation of liver MRI contrast in control (n=20) and ID (n=12) embryos. Graphs show mean  $\pm$  standard deviation. Statistical significance was tested by two-sided unpaired t test (panels a,h) or two-sided Mann Whitney U test (panels b,e). P values: <0.0001 (panel a); 0.0005 (panel b); <0.0001 (panel e); <0.0001 (panel h). \*\*\* P<0.001, \*\*\*\* P<0.0001. Scale bars are 50  $\mu$ m (c,d) and 3 mm (f,g).

## Supplementary Figure 2. Maternal ID causes cardiovascular defects

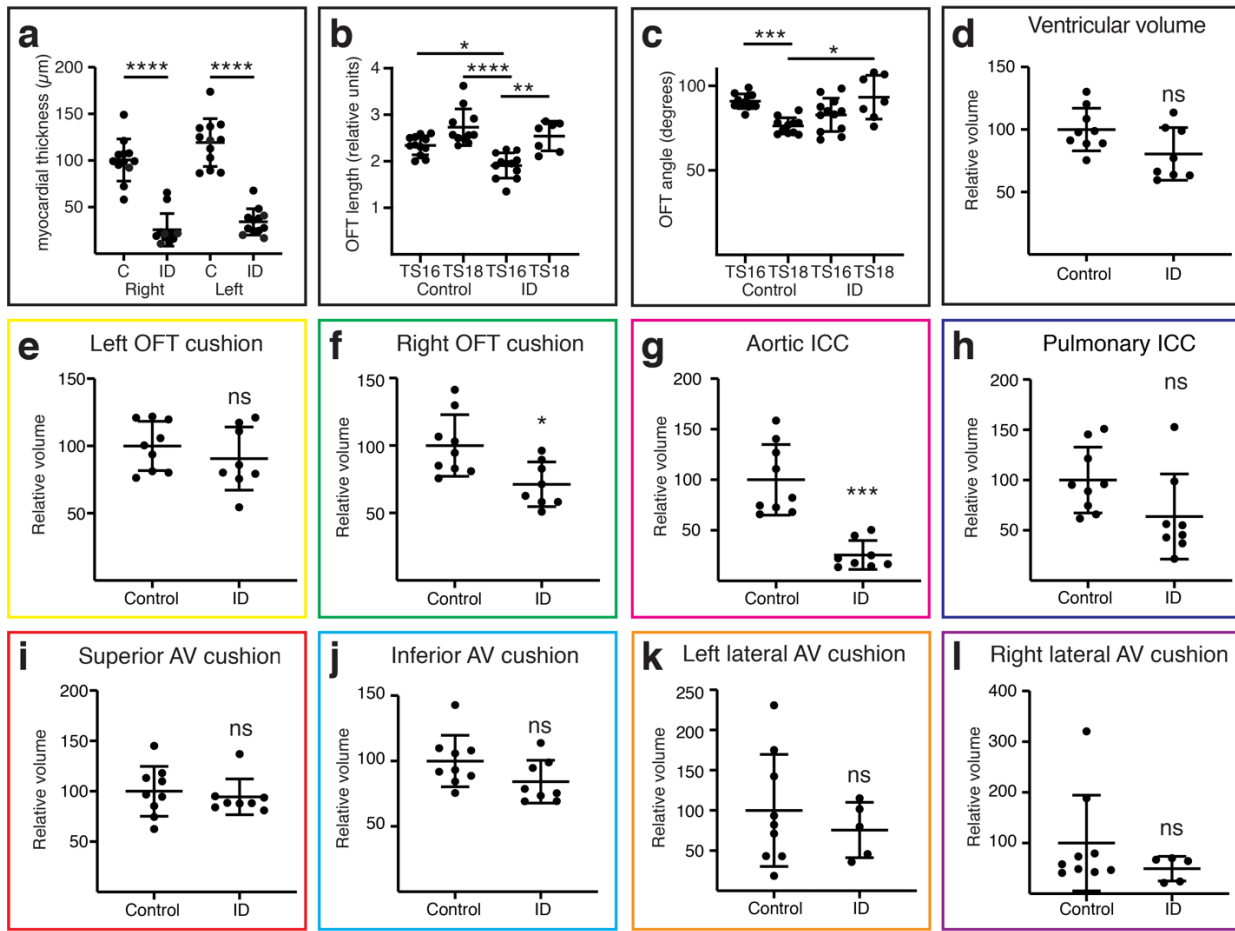

(a) Quantification of the ventricular myocardial thickness of hearts from E15.5 control (n=12) and ID (n=12) embryos. (b-c) Quantification of length (b) and angle between distal and proximal portions of the OFT (c) from control (TS16 n=12, TS18 n=12) and ID (TS16 n=11, TS18 n=7) E10.5 embryos. (d-l) Quantitation of whole ventricle and cardiac cushion volumes from 3D Amira models of manually-segmented HREM data from control (n=9) and ID (n=8, except for lateral AV cushions where n=5) E12.5 embryos. The panel border colour corresponds to the cushion colour in Figure 1 (panels h-q). Graphs show mean  $\pm$  standard deviation. Statistical significance was tested by two-sided Mann Whitney U test (panels a,i,l), two-sided unpaired t test (panels a',d,e,f,h,j,k), Kruskal-Wallis with Dunn's multiple comparisons test (panels b,c) or two-sided unpaired t test with Welch's correction (panel g) or P values: <0.0001 (panel a); <0.0001 (panel a'), 0.0295, <0.0001, 0.0036 (panel b); 0.0008, 0.0109 (panel c); 0.0521 (panels d); 0.3679 (panel e); 0.0101 (panel f); 0.0001 (panel g); 0.0650 (panel h); 0.4807 (panel i); 0.0945 (panel j); 0.4820 (panel k); 0.3636 (panel l). ns, not significant, \* P<0.05, \*\* P<0.01, \*\*\* P<0.001, \*\*\*\* P<0.0001.

**Supplementary Figure 3. Effects of ID on cardiac progenitor proliferation and TBX5 expression**

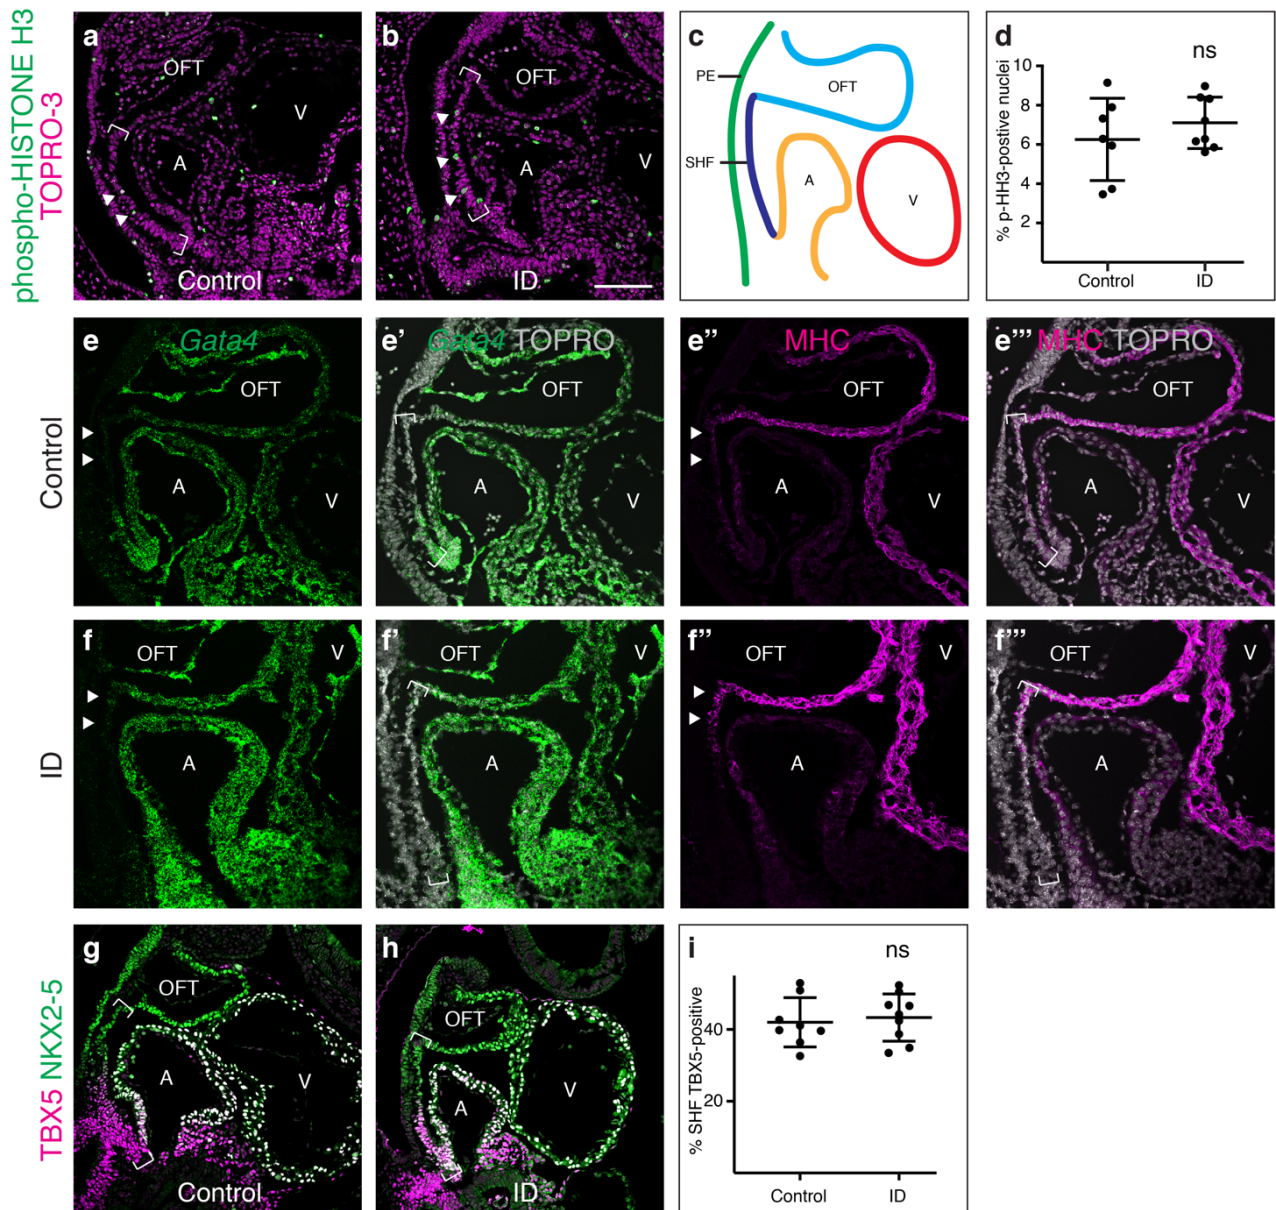

(a-d) Comparison of expression levels of phospho-Histone H3 (pHH3, green) in sagittal sections of control (a) and ID (b) E9.5 mouse embryos by immunohistochemistry. Nuclei were stained with TO-PRO-3 (magenta). Location of the SHF is indicated by brackets. White arrowheads indicate pHH3-positive cells. (c) Diagram indicating the relative positions of the SHF (dark blue), pharyngeal endoderm (green), OFT (light blue) and left ventricle (V, red) and left atrium (A, orange) in a sagittal section of an E9.5 embryo. (d) Quantification of number of pHH3-positive SHF cells in control (n=7) and ID (n=8) embryos. (e-f) Comparison of the expression pattern of *Gata4* transcripts by RNAScope (green) and MHC (magenta) by immunohistochemistry in control (e, n=11) and ID (f, n=7) E9.5 mouse embryos. Nuclei were stained with TO-PRO-3 (gray). Location of the SHF is indicated by brackets. White arrowheads indicate the aSHF. (g-i) Comparison of expression levels of TBX5 (magenta) and NKX2-5 (green) in control (h) and ID (i) E9.5 mouse embryos by immunohistochemistry. Location of the SHF is indicated by brackets. (j) Quantification of the percentage of TBX5-positive SHF in control (n=8) and ID (n=9) embryos. Graphs show mean  $\pm$  standard deviation. Statistical significance was tested by two-sided unpaired t test (panels d,i). P values: 0.3586 (panel d); 0.6907 (panel i). ns, not significant. Scale bar = 130  $\mu$ m (a,b,g,h) and 85  $\mu$ m (e,f).



## Supplementary Figure 4. The first intron of the *Gata4* gene contains a putative retinoic acid responsive enhancer

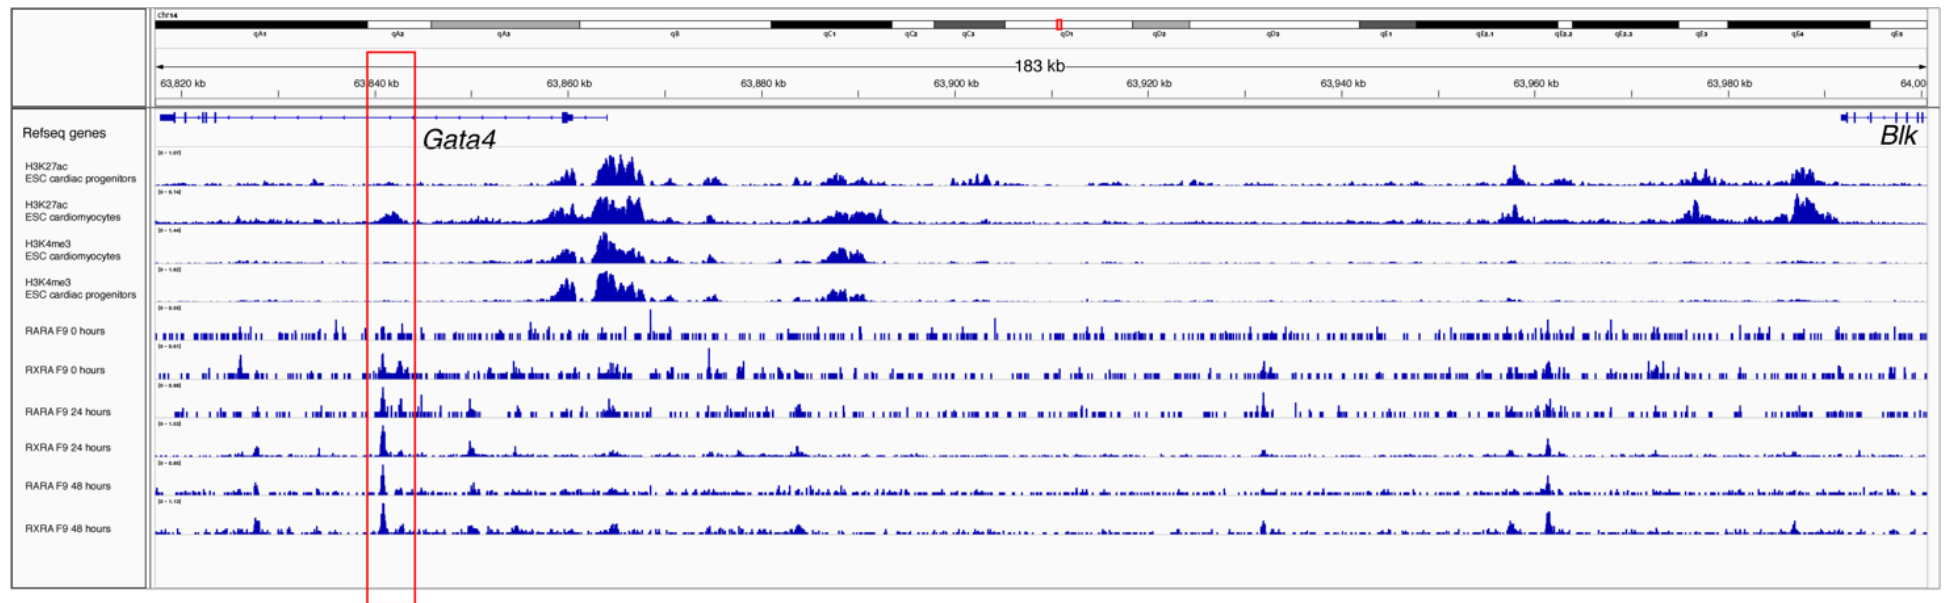

The 5' upstream region and first intron of the mouse *Gata4* gene as seen on the UCSC Browser (<http://genome.ucsc.edu>). The first four tracks show the enhancer-associated H3K27Ac and promoter-associated H3K4Me3 marks found in mouse embryonic stem cells differentiated into cardiac progenitors and cardiomyocytes<sup>1</sup>. The final six tracks show binding data of the retinoic acid receptors RARA and RXRA in F9 embryo carcinoma cells treated with retinoic acid for the indicated times<sup>2</sup>. The cardiomyocyte-specific H3K27Ac histone marks in the first intron of the *Gata4* gene (red box) correlate with RARA and RXRA binding sites in F9 EC cells treated with retinoic acid.



**Supplementary Figure 5. Effects of ID on lymphatic vasculature development and skeletal patterning**

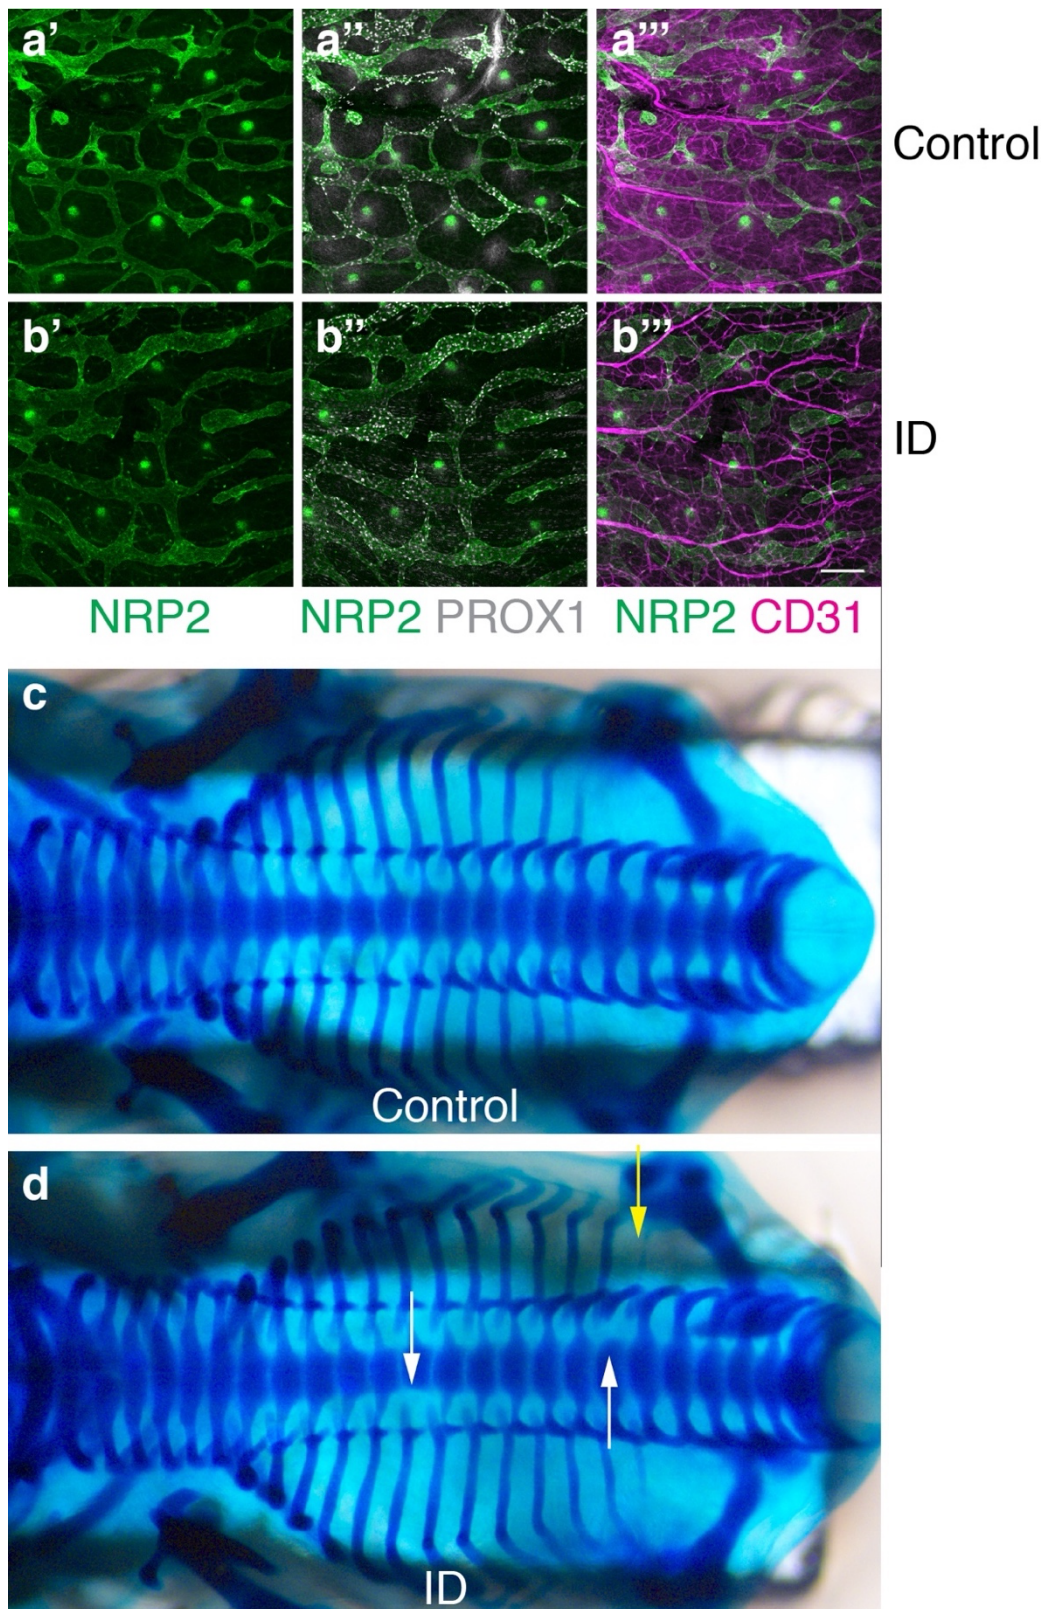

Comparison of NRP2, PROX1 and CD31 expression in back skin from control (n=10) and ID (n=11) E14.5 embryos. Magnified views of the boxed areas from Figure 5a,b are shown in panels a'-a''' and b'-b''', respectively. (c,d) Alcian blue staining of cartilage in control (c, 21/21 embryos) and ID (d, 29/33 embryos) E14.5 embryos. Missing pedicles (black arrows) and rib (yellow arrow) are indicated. Scale bar = 370  $\mu$ m (a,b) and 260  $\mu$ m (c,d).



**Supplementary Figure 6. Effects of maternal diet on blood haemoglobin levels and embryonic liver iron**

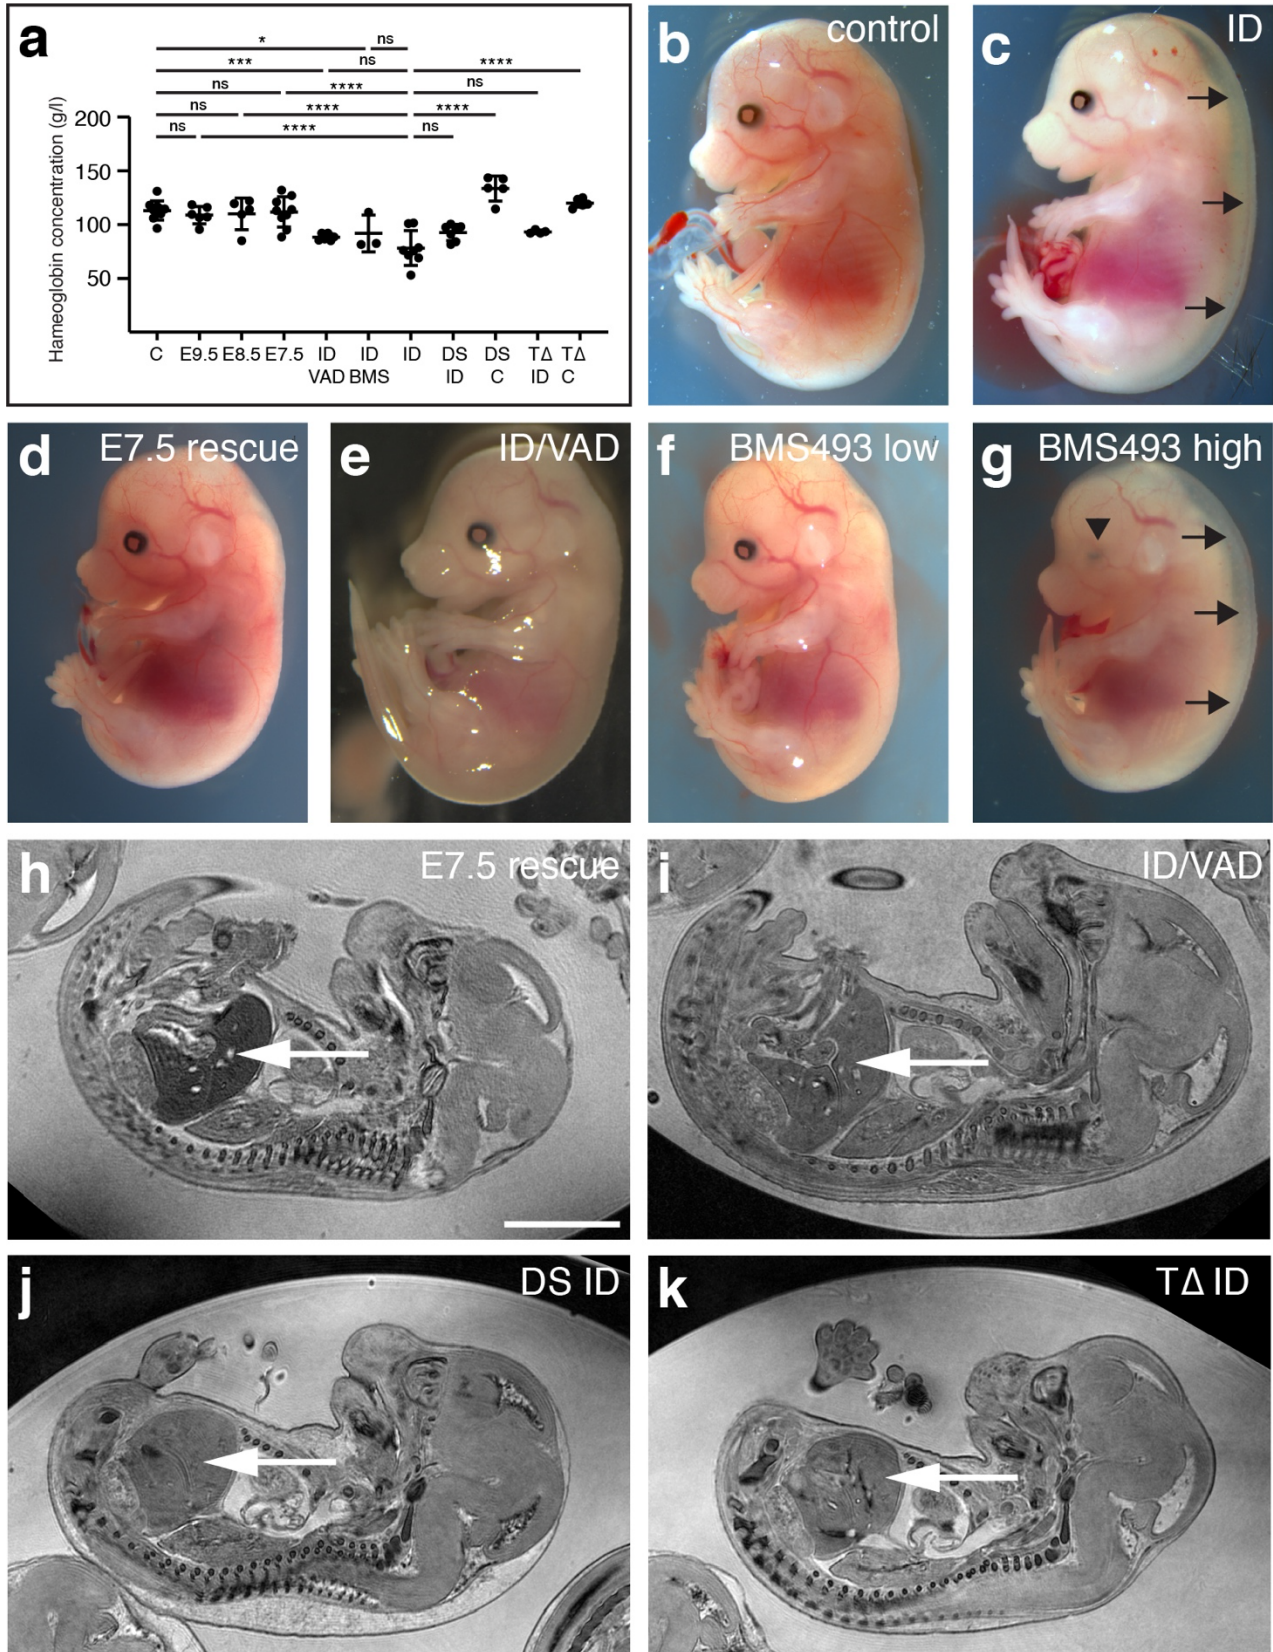

(a) Blood haemoglobin concentrations in pregnant adult C57BL/6J strain female mice measured at E15.5. C, mice fed control diet (n=10); E9.5 (n=6), E8.5 (n=5), E7.5 (n=9), mice fed from weaning on a low iron diet, then returned to control diet at the indicated stage of pregnancy; ID/VAD (n=6), mice fed from weaning on a low iron and Vitamin A-

deficient diet; ID/BMS (n=3), mice fed from weaning on a low iron and treated with 0.7 mg/kg BMS493 on E8.5 and E9.5; ID (n=8), mice fed from weaning on a low iron diet; DS ID (n=7), ID females crossed to *Dp1Tyb*<sup>+</sup> males; DS C (n=5), control females crossed to *Dp1Tyb*<sup>+</sup> males; TΔ ID (n=4), ID females crossed to *Tbx1*<sup>+/*null*</sup> males; TΔ C (n=7), control females crossed to *Tbx1*<sup>+/*null*</sup> males. (b-g) Representative images of E15.5 embryos from control (b); ID (c); (d) ID mothers returned to control diet on E7.5; (e) mothers fed a low iron and vitamin A-deficient diet; (f) ID mothers treated with 0.7 mg/kg BMS493; and (g) ID mothers treated with 3.5 mg/kg BMS493. Subcutaneous oedema (black arrows) and coloboma (black arrowhead) are indicated. Panels b and c are repeated from Figure 1. (h-k) Representative images showing relative liver MRI contrast in E15.5 embryos from (h) ID mothers returned to control diet on E7.5; (i) mothers fed a low iron and vitamin A-deficient diet; (j) *Dp1Tyb*<sup>+</sup> embryos from ID mothers; (k) *Tbx1*<sup>+/*null*</sup> embryos from an ID mother. The embryonic livers are shown by a white arrow. Graphs show mean ± standard deviation. Statistical significance was tested using one way ANOVA with Dunnett's multiple comparison test. P values: 0.9913 (C vs E9.5); 0.9993 (C vs E8.5); 0.9997 (C vs E7.5); 0.0005 (C vs ID VAD); 0.0376 (C vs ID BMS); <0.0001 (ID vs E9.5); <0.0001 (ID vs E8.5); <0.0001 (ID vs E7.5); 0.5029 (ID vs ID VAD); 0.4063 (ID vs ID BMS); 0.0953 (ID vs DS ID); <0.0001 (ID vs DS C); 0.1945 (ID vs TΔ ID); <0.0001 (ID vs TΔ C). ns, not significant, \* P<0.05, \*\*\* P<0.001, \*\*\*\* P<0.0001. Scale bar = 4.4 mm (b-g) and 3 mm (h-k).



**Supplementary Table 1. Summary of types of heart defects observed in E15.5 embryos.**

ASD, atrial septal defect; mVSD: membranous ventricular septal defect; musVSD: muscular ventricular septal defect; AVSD, atrioventricular septal defect; OFT, outflow tract defects (includes overriding aorta and double-outlet right ventricle); PTA, persistent *truncus arteriosus*. † one with type I PTA; ‡ three with type I PTA. Statistical significance was tested using one-sided Fisher's exact test.

| Types of defects |                      | Control | ID | E7.5 rescue | ID VAD | ID BMS4 93 |  | <i>Dp1Tyb+</i> ID | wild type ID | <i>Dp1Tyb+</i> control |  | <i>Tbx1<sup>+/-null</sup></i> ID | <i>Tbx1<sup>+/-</sup></i> ID | <i>Tbx1<sup>+/-null</sup></i> control |
|------------------|----------------------|---------|----|-------------|--------|------------|--|-------------------|--------------|------------------------|--|----------------------------------|------------------------------|---------------------------------------|
| Single           | ASD                  | 0       | 0  | 0           | 0      | 0          |  | 0                 | 0            | 0                      |  | 0                                | 0                            | 0                                     |
|                  | mVSD                 | 1       | 5  | 0           | 0      | 0          |  | 0                 | 1            | 0                      |  | 1                                | 1                            | 0                                     |
|                  | muscVSD              | 0       | 11 | 0           | 0      | 0          |  | 3                 | 1            | 1                      |  | 4                                | 3                            | 0                                     |
|                  | AVSD                 | 0       | 0  | 0           | 0      | 0          |  | 1                 | 0            | 0                      |  | 0                                | 0                            | 0                                     |
| Multiple         | OFT + mVSD           | 0       | 1  | 0           | 2      | 1          |  | 0                 | 2            | 0                      |  | 1                                | 0                            | 0                                     |
|                  | mVSD + muscVSD       | 0       | 4  | 0           | 0      | 0          |  | 0                 | 1            | 0                      |  | 2                                | 1                            | 0                                     |
|                  | OFT + mVSD + muscVSD | 0       | 4  | 0           | 0      | 0          |  | 3†                | 2            | 0                      |  | 4                                | 1                            | 1                                     |
|                  | mVSD + AVSD          | 0       | 0  | 0           | 0      | 0          |  | 0                 | 0            | 0                      |  | 0                                | 0                            | 0                                     |
|                  | OFT + mVSD + AVSD    | 0       | 0  | 0           | 0      | 0          |  | 1                 | 1            | 0                      |  | 0                                | 0                            | 0                                     |
|                  | muscVSD + AVSD       | 0       | 4  | 0           | 0      | 0          |  | 0                 | 0            | 0                      |  | 0                                | 1                            | 0                                     |
|                  | OFT + muscVSD + AVSD | 0       | 1  | 0           | 1      | 0          |  | 8‡                | 2            | 0                      |  | 1                                | 2                            | 0                                     |
| Total abnormal   |                      | 1       | 30 | 0           | 3      | 1          |  | 16                | 10           | 1                      |  | 13                               | 9                            | 1                                     |
| Total normal     |                      | 36      | 12 | 26          | 22     | 11         |  | 2                 | 9            | 15                     |  | 3                                | 3                            | 18                                    |

|                    |  |   |         |         |         |        |                                    |         |        |   |                                                  |         |         |   |
|--------------------|--|---|---------|---------|---------|--------|------------------------------------|---------|--------|---|--------------------------------------------------|---------|---------|---|
| P value vs control |  | - | <0.0001 | 0.5873  | 0.1752  | 0.4337 | P value vs <i>Dp1Tyb</i> + control | <0.0001 | 0.0037 | - | P value vs <i>Tbx1<sup>+/-null</sup></i> control | <0.0001 | <0.0001 | - |
| P value vs ID      |  | - | -       | <0.0001 | <0.0001 | 0.0001 | P value vs wild type               | 0.0186  | -      | - | P value vs <i>Tbx1<sup>+/+</sup></i> ID          | 0.5208  | -       | - |

**Supplementary Table 2. Summary of aortic arch morphology at E15.5**

IAA, interrupted aortic arch; A-RSA, aberrant right subclavian artery; R-LCC, retroesophageal left subclavian artery.

Note that an embryo may have more than one phenotype. Statistical significance was tested using one-sided Fisher's exact test

| Types of defects   | control | ID     | E7.5 rescue | ID VAD | ID BMS493 |                                   | <i>Dp1Tyb+</i> ID | wild type ID | <i>Dp1Tyb+</i> control |                                                  | <i>Tbx1<sup>+/-null</sup></i> ID | <i>Tbx1<sup>+/+</sup></i> ID | <i>Tbx1<sup>+/-null</sup></i> control |
|--------------------|---------|--------|-------------|--------|-----------|-----------------------------------|-------------------|--------------|------------------------|--------------------------------------------------|----------------------------------|------------------------------|---------------------------------------|
| IAA                | 0       | 3      | 0           | 0      | 0         |                                   | 4                 | 1            | 0                      |                                                  | 0                                | 0                            | 1                                     |
| A-RSA              | 0       | 1      | 1           | 1      | 0         |                                   | 1                 | 3            | 0                      |                                                  | 4                                | 1                            | 4                                     |
| R-LCC              | 0       | 1      | 0           | 0      | 0         |                                   | 2                 | 0            | 1                      |                                                  | 0                                | 0                            | 0                                     |
| right-sided AA     | 1       | 1      | 0           | 0      | 0         |                                   | 2                 | 0            | 1                      |                                                  | 2                                | 0                            | 1                                     |
| abnormal           | 1       | 5      | 1           | 1      | 0         |                                   | 7                 | 4            | 1                      |                                                  | 6                                | 1                            | 6                                     |
| normal             | 36      | 35     | 24          | 24     | 11        |                                   | 11                | 15           | 14                     |                                                  | 10                               | 11                           | 13                                    |
| P value vs control | -       | 0.1189 | 0.6478      | 0.6478 | 0.7708    | P value vs <i>Dp1Tyb+</i> control | 0.0375            | 0.2507       | -                      | P value vs <i>Tbx1<sup>+/-null</sup></i> control | 0.4946                           | 0.1430                       | -                                     |
| P value vs ID      | -       | -      | 0.2456      | 0.2456 | 0.2801    | P value vs wild type ID           | 0.2046            | -            | -                      | P value vs <i>Tbx1<sup>+/+</sup></i> ID          | 0.0908                           | -                            | -                                     |



**Supplementary table 3****Genotyping primer sequences**

| <b>Strain</b>                    | <b>Sequence</b>                                    | <b>Product</b> |
|----------------------------------|----------------------------------------------------|----------------|
| <i>Tg(Mef2c-EGFP)#Krc</i>        | GTGAGGAGGGAGCTGCAGTATGTTTG<br>AAGTCGTGCTGCTTCATGTG | 550 bp         |
| <i>Tg(RARE-Hspa1b/lacZ)12Jrt</i> | ATCCTCTGCATGGTCAGGTC<br>CGTGGCCTGATTCATTCC         | 300 bp         |
| <i>Dp(16Lipi-Zbtb21)1TybEmcf</i> | CCTCGAGCTGTTTCCTGCTAT<br>GAAGAATTTCTGTGGGGCAA      | 500 bp         |
| <i>Tbx1<sup>tm1Bld</sup></i>     | CTGGGCACAACAGACAATCGGCT<br>TATTCGGCAAGCAGGCATCGCCA | 500 bp         |

## Supplementary Table 4

### Antibodies

| Target                                    | Name       | Catalog number | Species and type            | Supplier                                          | Dilution |
|-------------------------------------------|------------|----------------|-----------------------------|---------------------------------------------------|----------|
| <b>Primary antibodies</b>                 |            |                |                             |                                                   |          |
| MYOSIN II HEAVY CHAIN                     | MF 20      |                | mouse monoclonal            | Developmental Studies Hybridoma Bank <sup>3</sup> | 1:100    |
| phospho-HISTONE H3                        | (Ser 10)-R | sc-8656        | rabbit polyclonal           | Santa Cruz Biotechnology                          | 1:200    |
| GATA4                                     |            | sc-25310       | mouse monoclonal            | Santa Cruz Biotechnology                          | 1:100    |
| TBX5                                      |            | sc-515536      | mouse polyclonal            | Santa Cruz Biotechnology                          | 1:500    |
| NKX2-5                                    | N-19       | sc-8697        | goat polyclonal             | Santa Cruz Biotechnology                          | 1:250    |
| CD31 (heart)                              |            | ab119341       | Armenian hamster monoclonal | Abcam                                             | 1:500    |
| CD31 (back skin)                          |            | 553370         | rat monoclonal              | BD Pharmingen                                     | 1:500    |
| PROX1                                     |            | AF2727         | goat polyclonal             | R&D systems                                       | 1:500    |
| NRP2                                      | D39A5      | 3366           | rabbit monoclonal           | Cell Signaling Technology                         | 1:500    |
| β-GALACTOSIDASE                           |            | ab9361         | Chicken polyclonal          | Abcam                                             | 1:200    |
| <b>Secondary antibodies</b>               |            |                |                             |                                                   |          |
| Donkey anti-mouse Cy <sup>TM</sup> 3      |            | 715-165-151    |                             | Jackson ImmunoResearch                            | 1:500    |
| Donkey anti-mouse AlexaFluor® 488         |            | 715-545-151    |                             | Jackson ImmunoResearch                            | 1:500    |
| Donkey anti-rabbit Cy <sup>TM</sup> 3     |            | 711-165-152    |                             | Jackson ImmunoResearch                            | 1:500    |
| Donkey anti-rabbit AlexaFluor® 488        |            | 711-545-152    |                             | Jackson ImmunoResearch                            | 1:500    |
| Donkey anti-goat AlexaFluor® 488          |            | A-11055        |                             | Thermo Fisher Scientific                          | 1:500    |
| Donkey anti-rat Dylight <sup>TM</sup> 405 |            | 712-475-153    |                             | Jackson ImmunoResearch                            | 1:500    |
| Goat anti-Armenian hamster Biotinylated   |            | ab5744         |                             | Abcam                                             | 1:250    |
| Donkey anti-chicken IgY Peroxidase        |            | 703-035-155    |                             | Jackson ImmunoResearch                            | 1:500    |
| <b>Nuclear stain</b>                      |            |                |                             |                                                   |          |
| TO-PRO®-3 Iodide                          |            | T3605          |                             | Life Technologies                                 | 1:10,000 |

## Supplementary References

1. Wamstad, J. A. *et al.* Dynamic and coordinated epigenetic regulation of developmental transitions in the cardiac lineage. *Cell* **151**, 206-220, doi:10.1016/j.cell.2012.07.035 (2012).
2. Chatagnon, A. *et al.* RAR/RXR binding dynamics distinguish pluripotency from differentiation associated cis-regulatory elements. *Nucleic Acids Res* **43**, 4833-4854, doi:10.1093/nar/gkv370 (2015).
3. Bader, D., Masaki, T. & Fischman, D. A. Immunochemical analysis of myosin heavy chain during avian myogenesis in vivo and in vitro. *J Cell Biol* **95**, 763-770, doi:10.1083/jcb.95.3.763 (1982).
